# Supplementary material for: Helix preferences of cyclopentane-containing β/γ-hybrid peptides
Source: Royal Society of Chemistry journal article supplement (doi:10.1039/d4nj02574a), 2024-01-01
Supplement: d4nj02574a1.pdf [file d4nj02574a1.pdf]

## Supplementary information

# Helix preferences of cyclopentane-containing $\beta/\gamma$ -hybrid peptides

Hae Sook Park<sup>a</sup> and Young Kee Kang<sup>\*b</sup>

<sup>a</sup> Department of Nursing, Cheju Halla University, Cheju 63092, Republic of Korea

<sup>b</sup> Department of Chemistry, Chungbuk National University, Cheongju, Chungbuk 28644, Republic of Korea. E-mail: ykkang@chungbuk.ac.kr

| Page  | Contents                                                                                                                                                                                                                                                                                                                    |
|-------|-----------------------------------------------------------------------------------------------------------------------------------------------------------------------------------------------------------------------------------------------------------------------------------------------------------------------------|
| s1–s2 | Table of Contents                                                                                                                                                                                                                                                                                                           |
| s3    | Fig. S1 Structures of conformers d12–d18 of Ac- $\beta$ Ac <sub>5</sub> a- $\gamma$ (Et)Ac <sub>5</sub> a-NHMe optimized at the PCM M06-2X/6-31+G(d) level of theory in chloroform                                                                                                                                          |
| s4–s5 | Table S1. H-bond types and torsion angles of 16 local minima of the pentamer composed of $\beta$ Ac <sub>5</sub> a- $\gamma$ (Et)Ac <sub>5</sub> a dimeric units optimized at the PCM M06-2X/6-31+G(d) level of theory in chloroform                                                                                        |
| s6    | Fig. S2 Structures of conformers p11–p16 of the pentamer composed of $\beta$ Ac <sub>5</sub> a- $\gamma$ (Et)Ac <sub>5</sub> a dimeric units optimized at the PCM M06-2X/6-31+G(d) level of theory in chloroform                                                                                                            |
| s7    | Table S2 Torsion angles and relative thermodynamic properties, and populations for H <sub>13</sub> -helical and C <sub>8/9</sub> -ribbon structures of the tetramer composed of $\beta$ Ac <sub>5</sub> a- $\gamma$ (Et)Ac <sub>5</sub> a dimeric units optimized at the PCM M06-2X/6-31+G(d) level of theory in chloroform |
| s8    | Table S3 Backbone torsion angles of other helical structures of $\beta/\gamma$ -hybrid peptides                                                                                                                                                                                                                             |
| s9    | Fig. S3 H <sub>13</sub> -helical and C <sub>8/9</sub> -ribbon structures of the tetramer composed of $\beta$ Ac <sub>5</sub> a- $\gamma$ (Et)Ac <sub>5</sub> a dimeric units optimized at the PCM M06-2X/6-31+G(d) level of theory in chloroform                                                                            |
| s10   | Conformational study of C <sub>8/9</sub> -ribbon structures for Boc-[(R,R)-tACBC- $\gamma$ Abu] <sub>3</sub> -OMe                                                                                                                                                                                                           |
| s11   | Table S4 Torsion angles and relative thermodynamic properties, and populations for the four C <sub>8/9</sub> -ribbon structures of Boc-[(R,R)-tACBC- $\gamma$ Abu] <sub>3</sub> -OMe in chloroform                                                                                                                          |

- s12 Fig. S4 Four possible structures of Boc-[(*R,R*)-*t*ACBC- $\gamma$ Abu]<sub>3</sub>-OMe by considering the combination of C<sub>9</sub><sup>I</sup> and C<sub>9</sub><sup>I'</sup> structures for  $\gamma$ Abu residues optimized at the PCM M06-2X/6-31+G(d) level of theory in chloroform
- s13–s15 Cartesian coordinates of the H<sub>13</sub> helical structures of the pentamer composed of  $\beta$ Ac<sub>5</sub> $\alpha$ - $\gamma$ (Et)Ac<sub>5</sub> $\alpha$  dimeric units and its analog with two pyrrolidines at the first and fourth residues optimized at the PCM M06-2X/6-31+G(d) level of theory in chloroform

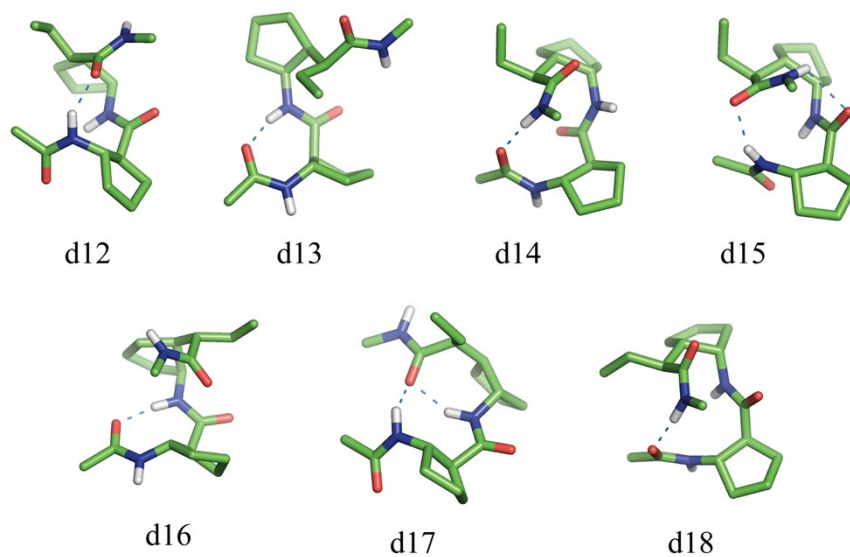

**Fig. S1** Conformers d12–d18 of Ac-βAc<sub>5</sub>a-γ(Et)Ac<sub>5</sub>a-NHMe optimized at the PCM M06-2X/6-31+G(d) level of theory in chloroform. For clarity, all non-polar hydrogen atoms are omitted. All H-bonds are represented by dotted lines.

**Table S1** H-bond types and torsion angles (deg) of 16 local minima of the pentamer composed of  $\beta\text{Ac}_5\alpha\text{-}\gamma(\text{Et})\text{Ac}_5\alpha$  dimeric units optimized at the PCM M06-2X/6-31+G(d) level of theory in chloroform<sup>a</sup>

| Conf. | H-bond type <sup>b</sup>                                                         | Residues   | $\phi$ | $\theta$ | $\zeta$ | $\psi$ | $\chi^1$ |
|-------|----------------------------------------------------------------------------------|------------|--------|----------|---------|--------|----------|
| p01   | $\text{H}_{13}$ ( $\text{H}_{13}^{\text{I}}$ )                                   | $\beta 1$  | -63    | 113      |         | -143   | -20      |
|       |                                                                                  | $\gamma 2$ | -152   | 51       | 57      | -111   | -27      |
|       |                                                                                  | $\beta 3$  | -127   | 111      |         | -93    | -20      |
|       |                                                                                  | $\gamma 4$ | -137   | 51       | 58      | -128   | -27      |
|       |                                                                                  | $\beta 5$  | -96    | 92       |         | -108   | -2       |
| p02   | $\text{C}_{8/9}$ -ribbon ( $\text{C}_{8/9}^{\text{IV}}$ )                        | $\beta 1$  | -74    | 128      |         | -62    | -33      |
|       |                                                                                  | $\gamma 2$ | -98    | 58       | 79      | -94    | -36      |
|       |                                                                                  | $\beta 3$  | -70    | 128      |         | -62    | -33      |
|       |                                                                                  | $\gamma 4$ | -98    | 59       | 79      | -94    | -36      |
|       |                                                                                  | $\beta 5$  | -70    | 129      |         | -63    | -33      |
| p03   | $2\text{C}_{8/13}$                                                               | $\beta 1$  | -73    | 127      |         | -83    | -31      |
|       |                                                                                  | $\gamma 2$ | -172   | 50       | 52      | -111   | -24      |
|       |                                                                                  | $\beta 3$  | -72    | 126      |         | -81    | -30      |
|       |                                                                                  | $\gamma 4$ | -171   | 50       | 52      | -112   | -25      |
|       |                                                                                  | $\beta 5$  | -71    | 127      |         | -65    | -32      |
| p04   | $2\text{C}_{13}, \text{C}_{13/17}$ ( $\text{H}_{18/17}^{\text{I}}$ )             | $\beta 1$  | -118   | 110      |         | -105   | -19      |
|       |                                                                                  | $\gamma 2$ | -111   | 43       | 54      | -146   | -19      |
|       |                                                                                  | $\beta 3$  | -86    | 104      |         | -117   | -13      |
|       |                                                                                  | $\gamma 4$ | 180    | 55       | 69      | -101   | -31      |
|       |                                                                                  | $\beta 5$  | -148   | 67       |         | -98    | 34       |
| p05   | $\text{C}_{8/9}$ -ribbon ( $\text{C}_{8/9}^{\text{IV}}$ )                        | $\beta 1$  | -71    | 131      |         | -69    | 13       |
|       |                                                                                  | $\gamma 2$ | -97    | 59       | 79      | -91    | -36      |
|       |                                                                                  | $\beta 3$  | -67    | 131      |         | -68    | 13       |
|       |                                                                                  | $\gamma 4$ | -97    | 59       | 80      | -91    | -36      |
|       |                                                                                  | $\beta 5$  | -67    | 132      |         | -70    | 13       |
| p06   | $\text{H}_{11/13}$                                                               | $\beta 1$  | 65     | 82       |         | -83    | 42       |
|       |                                                                                  | $\gamma 2$ | -145   | 39       | 45      | 54     | -13      |
|       |                                                                                  | $\beta 3$  | 71     | 94       |         | -108   | 36       |
|       |                                                                                  | $\gamma 4$ | -131   | 44       | 42      | 58     | -21      |
|       |                                                                                  | $\beta 5$  | 61     | 101      |         | -100   | -15      |
| p07   | $\text{C}_{17}, \text{C}_{18}, \text{C}_{13}$ ( $\text{H}_{18/17}^{\text{II}}$ ) | $\beta 1$  | -157   | 98       |         | -157   | -12      |
|       |                                                                                  | $\gamma 2$ | -140   | 50       | 57      | -106   | -26      |
|       |                                                                                  | $\beta 3$  | -161   | 123      |         | -167   | -29      |
|       |                                                                                  | $\gamma 4$ | -168   | 51       | 57      | -100   | -23      |
|       |                                                                                  | $\beta 5$  | -120   | 92       |         | -108   | -4       |
| p08   | $\text{H}_{13/11}$ ( $\text{H}_{13/11}^{\text{II}}$ )                            | $\beta 1$  | -150   | 66       |         | 65     | 22       |
|       |                                                                                  | $\gamma 2$ | 77     | 35       | 60      | -151   | -35      |
|       |                                                                                  | $\beta 3$  | -111   | 71       |         | 99     | 43       |
|       |                                                                                  | $\gamma 4$ | 67     | 17       | 57      | -148   | -34      |
|       |                                                                                  | $\beta 5$  | -75    | 68       |         | 74     | 41       |
| p09   | $2\text{C}_8\text{C}_9, \text{C}_8$ ( $\text{C}_{8/9}^{\text{II}}$ )             | $\beta 1$  | -108   | 70       |         | 5      | 34       |
|       |                                                                                  | $\gamma 2$ | -101   | 57       | 78      | -111   | -39      |
|       |                                                                                  | $\beta 3$  | -104   | 62       |         | 33     | 36       |
|       |                                                                                  | $\gamma 4$ | -89    | 62       | 68      | -126   | -36      |

|     |                                      |            |      |     |     |      |     |
|-----|--------------------------------------|------------|------|-----|-----|------|-----|
|     |                                      | $\beta 5$  | -66  | 127 |     | -64  | -33 |
| p10 | $2C_{8/13}, C_8$                     | $\beta 1$  | -76  | 134 |     | -81  | 12  |
|     |                                      | $\gamma 2$ | -177 | 48  | 47  | -135 | -18 |
|     |                                      | $\beta 3$  | -81  | 131 |     | -80  | 13  |
|     |                                      | $\gamma 4$ | -176 | 52  | 52  | -131 | -28 |
|     |                                      | $\beta 5$  | -80  | 127 |     | -60  | 15  |
| p11 | $3C_8$                               | $\beta 1$  | -74  | 128 |     | -60  | 15  |
|     |                                      | $\gamma 2$ | -143 | 51  | 54  | 65   | -26 |
|     |                                      | $\beta 3$  | -75  | 130 |     | -68  | 14  |
|     |                                      | $\gamma 4$ | -122 | 42  | 44  | 47   | -17 |
|     |                                      | $\beta 5$  | -74  | 132 |     | -69  | 13  |
| p12 | $3C_8$                               | $\beta 1$  | -73  | 129 |     | -61  | -34 |
|     |                                      | $\gamma 2$ | -155 | 42  | 46  | 48   | -15 |
|     |                                      | $\beta 3$  | -94  | 110 |     | -46  | -22 |
|     |                                      | $\gamma 4$ | -121 | 32  | 41  | 45   | -3  |
|     |                                      | $\beta 5$  | -86  | 122 |     | -60  | -30 |
| p13 | $3C_8$                               | $\beta 1$  | -81  | 122 |     | -54  | -31 |
|     |                                      | $\gamma 2$ | 66   | 5   | 50  | 37   | -31 |
|     |                                      | $\beta 3$  | -77  | 124 |     | -58  | -31 |
|     |                                      | $\gamma 4$ | 66   | 2   | 46  | 44   | -29 |
|     |                                      | $\beta 5$  | -76  | 129 |     | -65  | -34 |
| p14 | $H_{15/16} (H_{15/16}^{II})$         | $\beta 1$  | -165 | 111 |     | -128 | -21 |
|     |                                      | $\gamma 2$ | -147 | 49  | -84 | 96   | -18 |
|     |                                      | $\beta 3$  | 67   | 75  |     | -165 | 20  |
|     |                                      | $\gamma 4$ | -115 | 56  | -64 | -76  | -43 |
|     |                                      | $\beta 5$  | -121 | 90  |     | 78   | 38  |
| p15 | $C_{20}, C_{22}, 2C_7 (H_{20/22}^V)$ | $\beta 1$  | 60   | 112 |     | -139 | -23 |
|     |                                      | $\gamma 2$ | -148 | 52  | -84 | -150 | -18 |
|     |                                      | $\beta 3$  | 58   | 106 |     | -132 | -19 |
|     |                                      | $\gamma 4$ | -119 | 3   | -74 | -121 | -26 |
|     |                                      | $\beta 5$  | 66   | 73  |     | 179  | 42  |
| p16 | $3C_8, C_{9/18}$                     | $\beta 1$  | 32   | 62  |     | -109 | 35  |
|     |                                      | $\gamma 2$ | -104 | 59  | 75  | -75  | -37 |
|     |                                      | $\beta 3$  | 42   | 63  |     | -106 | 39  |
|     |                                      | $\gamma 4$ | -113 | 48  | 62  | -157 | -30 |
|     |                                      | $\beta 5$  | 33   | 64  |     | -108 | 42  |

<sup>a</sup> Torsion angles are defined in Fig. 3. <sup>b</sup>  $C_n$  and  $C_n/m$  represent an  $n$ -membered H-bond and a bifurcated H-bond with  $n$ - and  $m$ -membered pseudorings, respectively. The helical structure with  $C_n$  (or  $C_n/m$ ) H-bonds was represented by  $H_n$  (or  $H_{n/m}$ ). The initial structures for optimization were shown in parentheses, taken from ref. s1. The primed type of H-bond stands for the enantiomer of the corresponding helical structure in ref. s1.

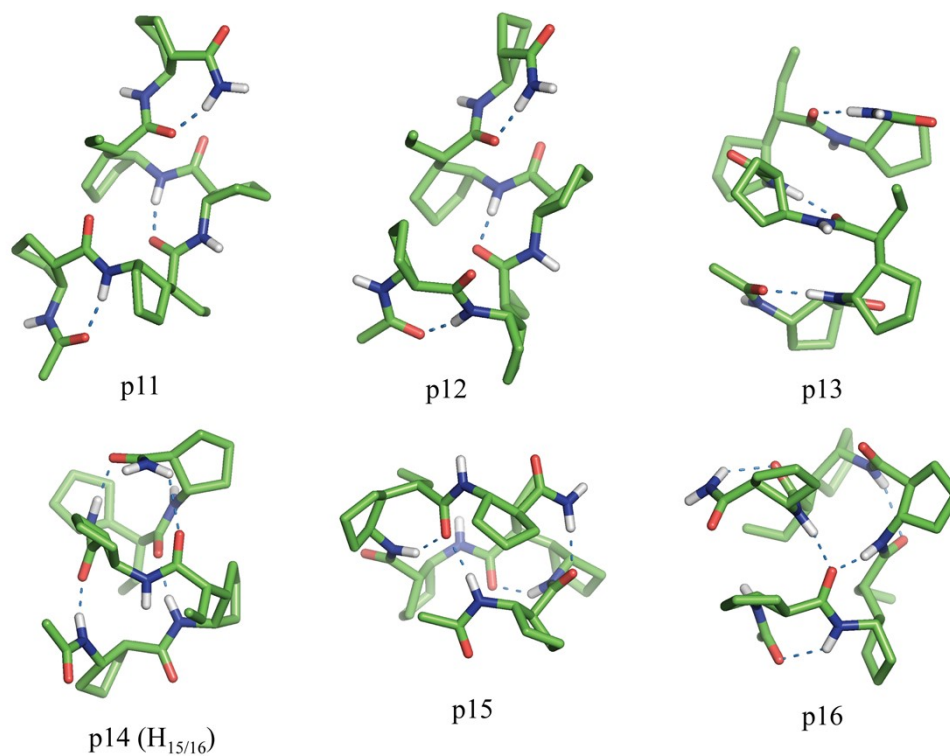

**Fig. S2** Conformers p11–p16 of the pentamer composed of  $\beta$ Ac<sub>5</sub>a- $\gamma$ (Et)Ac<sub>5</sub>a dimeric units optimized at the PCM M06-2X/6-31+G(d) level of theory in chloroform. For clarity, all non-polar hydrogen atoms are omitted. All H-bonds are represented by dotted lines.

**Table S2** Torsion angles (deg) and relative thermodynamic properties (kcal/mol), and populations (%) for H<sub>13</sub>-helical and C<sub>8/9</sub>-ribbon structures of the tetramer composed of  $\beta$ Ac<sub>5</sub>a- $\gamma$ (Et)Ac<sub>5</sub>a dimeric units optimized at the PCM M06-2X/6-31+G(d) level of theory in chloroform<sup>a</sup>

| Conf.                                 | Residues   | $\phi$ | $\theta$ | $\zeta$ | $\psi$ | $\Delta E_0^b$ | $\Delta E_s^c$ | $\Delta H_s^d$ | $\Delta G_s^e$ | $\omega^f$ |
|---------------------------------------|------------|--------|----------|---------|--------|----------------|----------------|----------------|----------------|------------|
| H <sub>13</sub>                       | $\beta$ 1  | -63    | 114      |         | -141   | 0.00           | 0.00           | 0.00           | 0.00           | 0.1        |
|                                       | $\gamma$ 2 | -154   | 51       | 57      | -113   |                |                |                |                |            |
|                                       | $\beta$ 3  | -116   | 109      |         | -99    |                |                |                |                |            |
|                                       | $\gamma$ 4 | -137   | 51       | 60      | -124   |                |                |                |                |            |
| C <sub>8</sub> C <sub>9</sub> -ribbon | $\beta$ 1  | -73    | 129      |         | -63    | 0.49           | 3.82           | 4.16           | 4.32           | 99.9       |
|                                       | $\gamma$ 2 | -99    | 58       | 79      | -94    |                |                |                |                |            |
|                                       | $\beta$ 3  | -70    | 128      |         | -62    |                |                |                |                |            |
|                                       | $\gamma$ 4 | -95    | 58       | 81      | -96    |                |                |                |                |            |

<sup>a</sup> Torsion angles are defined in Fig. 3. Calculated at the M06-2X/def2-TZVP//PCM M06-2X/6-31+G(d) level of theory in chloroform at 25 °C. <sup>b</sup> Relative energies calculated at the M06-2X/def2-TZVP level of theory in the gas phase. <sup>c</sup> Relative energies in chloroform. <sup>d</sup> Relative enthalpies in chloroform at 25 °C. <sup>e</sup> Relative Gibbs free energies in chloroform at 25 °C. <sup>f</sup> Populations calculated by  $\Delta G_s$  values in chloroform at 25 °C.

**Table S3** Backbone torsion angles (deg) of other helical structures of  $\beta/\gamma$ -hybrid peptides<sup>a</sup>

| Peptides                                                                             | Helix type <sup>b</sup>                        | Residues   | $\phi$ | $\theta$ | $\zeta$ | $\psi$ |
|--------------------------------------------------------------------------------------|------------------------------------------------|------------|--------|----------|---------|--------|
| $\beta$ Caa <sub>(x)</sub> - $\gamma$ Caa <sub>(x)</sub> pentamer (NMR) <sup>c</sup> | <i>(M)</i> -H <sub>11/13</sub> <sup>III'</sup> | $\beta$    | 145    | 68       |         | -8     |
|                                                                                      |                                                | $\gamma$   | 123    | -84      | 63      | -106   |
| $\beta$ Leu- $\gamma$ Adb hexamer (NMR) <sup>d</sup>                                 | <i>(P)</i> -H <sub>11</sub> <sup>II</sup>      | $\beta$ 1  | 68     | 52       |         | 34     |
|                                                                                      |                                                | $\gamma$ 2 | 101    | 79       | -62     | 145    |
|                                                                                      |                                                | $\beta$ 3  | 65     | 47       |         | 63     |
|                                                                                      |                                                | $\gamma$ 4 | 91     | 75       | -60     | 135    |
|                                                                                      |                                                | $\beta$ 5  | 63     | 54       |         | 82     |
|                                                                                      |                                                | $\gamma$ 6 | 136    | -77      | 71      | 79     |
| <i>t</i> ACBC- $\gamma$ Abu hexamer (DFT) <sup>e</sup>                               | C <sub>8/9</sub> -ribbon                       | $\beta$ 1  | 89     | -101     |         | 32     |
|                                                                                      |                                                | $\gamma$ 2 | -99    | 68       | 74      | -89    |
|                                                                                      |                                                | $\beta$ 3  | 88     | -101     |         | 33     |
|                                                                                      |                                                | $\gamma$ 4 | 100    | -69      | -73     | 95     |
|                                                                                      |                                                | $\beta$ 5  | 88     | -100     |         | 28     |
|                                                                                      |                                                | $\gamma$ 6 | -86    | -56      | -67     | 170    |
| <i>t</i> ACBC- $\gamma$ Abu hexamer (DFT) <sup>f</sup>                               | C <sub>8/9</sub> -ribbon                       | $\beta$ 1  | 91     | -99      |         | 25     |
|                                                                                      |                                                | $\gamma$ 2 | -99    | 67       | 76      | -90    |
|                                                                                      |                                                | $\beta$ 3  | 91     | -100     |         | 27     |
|                                                                                      |                                                | $\gamma$ 4 | -99    | 67       | 76      | -91    |
|                                                                                      |                                                | $\beta$ 5  | 92     | -100     |         | 27     |
|                                                                                      |                                                | $\gamma$ 6 | -92    | 56       | 63      | 13     |
| $\beta$ Ala- $\gamma$ Abu octamer (HF) <sup>g</sup>                                  | <i>(M)</i> -H <sub>11/13</sub> <sup>III'</sup> | $\beta$    | -86    | 61       |         | 16     |
|                                                                                      |                                                | $\gamma$   | 94     | -81      | 72      | -151   |
|                                                                                      | <i>(P)</i> -H <sub>11</sub> <sup>II</sup>      | $\beta$    | 79     | 47       |         | 68     |
|                                                                                      |                                                | $\gamma$   | 81     | 80       | -72     | 138    |
|                                                                                      | C <sub>8/9</sub> <sup>IV</sup> -ribbon         | $\beta$    | 72     | -132     |         | 64     |
|                                                                                      |                                                | $\gamma$   | 98     | -69      | -75     | 98     |

<sup>a</sup> Torsion angles are defined in Fig. 3. <sup>b</sup> *(M)*- and *(P)*-H<sub>*n*</sub> stand for the left- and right-handed helices with repeated C<sub>*n*</sub> pseudocycles. H<sub>11/13</sub><sup>III'</sup> is an enantiomer of the H<sub>11/13</sub><sup>III</sup> structures of Ac-( $\beta$ Ala- $\gamma$ Abu)<sub>4</sub>-NHMe (peptide **1**) optimized at the HF/6-31G(d) level of theory taken from ref. s1. <sup>c</sup> Mean values deduced from <sup>1</sup>H NMR spectrum of Boc-[ $\beta$ Caa<sub>(x)</sub>- $\gamma$ Caa<sub>(x)</sub>]<sub>2</sub>- $\beta$ Caa<sub>(x)</sub>-OMe (peptide **4**) in CDCl<sub>3</sub> taken from ref. s2.  $\beta$ Caa and  $\gamma$ Caa<sub>(x)</sub> stand for C-linked carbo- $\beta$ - and  $\gamma$ -amino acids of D-xylose, respectively. <sup>d</sup> Deduced from <sup>1</sup>H NMR spectrum of Boc-[ $\beta$ Leu- $\gamma$ Adb]<sub>3</sub>-OBn (peptide **5**) in CDCl<sub>3</sub> taken from ref. s3.  $\gamma$ Adb stands for 4-amino-3,3-dimethylbutanoic acid. <sup>e</sup> Boc-[(*R*, *R*)-*t*ACBC- $\gamma$ Abu]<sub>3</sub>-OBn (peptide **6**) optimized at the B3LYP/6-311G(d,p) level of theory in chloroform taken from ref. s4. <sup>f</sup> Ac-[(*R*,*R*)-*t*ACBC- $\gamma$ Abu]<sub>3</sub>-OMe optimized at the PCM M06-2X/6-31+G(d) level of theory in chloroform (this work). <sup>g</sup> Mean values from H<sub>11/13</sub><sup>III'</sup>, H<sub>11</sub><sup>II</sup>, and C<sub>8/9</sub><sup>IV</sup>-ribbon structures of Ac-( $\beta$ Ala- $\gamma$ Abu)<sub>4</sub>-NHMe (peptide **1**) optimized at the HF/6-31G(d) level of theory taken from ref. s1.



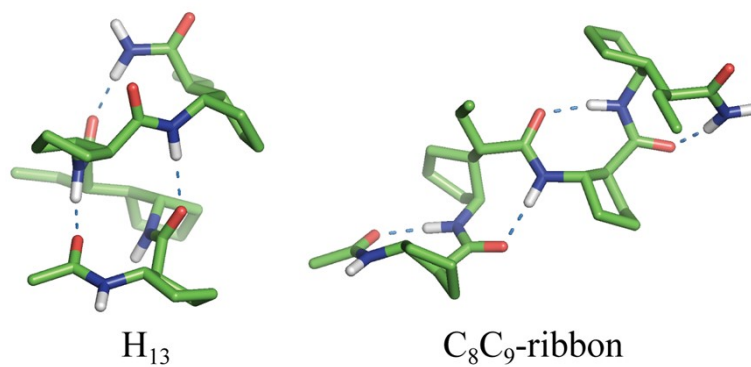

**Fig. S3**  $H_{13}$ -helical and  $C_{8/9}$ -ribbon structures of the tetramer composed of  $\beta Ac_5a$ - $\gamma(Et)Ac_5a$  dimeric units optimized at the PCM M06-2X/6-31+G(d) level of theory in chloroform. For clarity, all non-polar hydrogen atoms are omitted. All H-bonds are represented by dotted lines.

### Conformational study of C<sub>8/9</sub>-ribbon structures for Boc-[(R,R)-tACBC- $\gamma$ Abu]<sub>3</sub>-OMe

Aitken and his colleagues reported the most preferred C<sub>8/9</sub>-ribbon structure for Boc-[(R,R)-tACBC- $\gamma$ Abu]<sub>3</sub>-OBn (peptide **6**) by the conformational search and DFT calculation at the B3LYP/6-311G(d,p) level of theory in chloroform (ref. s4). Although the conformations of three (R,R)-tACBC residues are similar, those of three  $\gamma$ Abu residues are quite different from each other. The torsion angles of the second  $\gamma$ Abu residue are quite similar to those of the C<sub>9</sub><sup>I</sup> structure for the H<sub>9</sub><sup>I</sup> helical structure of Ac-( $\gamma$ Abu)<sub>6</sub>-NHMe optimized at the HF/6-31G(d) level of theory (ref. s1). The first  $\gamma$ Abu residue adopted the C<sub>9</sub><sup>I'</sup> structure, i.e., the enantiomer of the C<sub>9</sub><sup>I</sup> structure. However, the third  $\gamma$ Abu residue exhibited the unusual C<sub>9</sub> structure, which is denoted as C<sub>9</sub><sup>N</sup> structure.

To check the feasibility of other structures, we calculated the four possible structures of Boc-[(R,R)-tACBC- $\gamma$ Abu]<sub>3</sub>-OMe by considering the combination of C<sub>9</sub><sup>I</sup> and C<sub>9</sub><sup>I'</sup> structures for  $\gamma$ Abu residues; i.e., C<sub>9</sub><sup>I'</sup>C<sub>9</sub><sup>I'</sup>C<sub>9</sub><sup>I'</sup>, C<sub>9</sub><sup>I'</sup>C<sub>9</sub><sup>I'</sup>C<sub>9</sub><sup>N</sup>, C<sub>9</sub><sup>I'</sup>C<sub>9</sub><sup>I'</sup>C<sub>9</sub><sup>I</sup>, and C<sub>9</sub><sup>I'</sup>C<sub>9</sub><sup>I'</sup>C<sub>9</sub><sup>I'</sup>. The torsion angles and thermodynamic properties calculated at the M06-2X/def2-TZVP//PCM M06-2X/6-31+G(d) level of theory in chloroform at 25 °C are shown in Table S4 and the corresponding structures are depicted in Fig. S4.

The C<sub>8/9</sub> conformation with the C<sub>9</sub><sup>I'</sup>C<sub>9</sub><sup>I'</sup>C<sub>9</sub><sup>I'</sup> structure for  $\gamma$ Abu residues were found to be the most preferred (populated at 93.2%) and the conformation with the C<sub>9</sub><sup>I'</sup>C<sub>9</sub><sup>I'</sup>C<sub>9</sub><sup>N</sup> structure suggested by Aitken and his colleagues was populated only at 5.9% with  $\Delta G_s = 1.63$  kcal/mol in chloroform.

### References

- s1. C. Baldauf, R. Günther and H.-J. Hofmann, *J. Org. Chem.*, 2006, **71**, 1200–1208.
- s2. G. V. M. Sharma, V. B. Jadhav, K. V. S. Ramakrishna, P. Jayaprakash, K. Narsimulu, V. Subash and A. C. Kunwar, *J. Am. Chem. Soc.*, 2006, **128**, 14657–14668.
- s3. R. Misra, G. George, R. M. Reja, S. Dey, S. Raghothama and H. N. Gopi, *Chem. Commun.*, 2020, **56**, 2171–2173.
- s4. C. M. Grison, S. Robinab and D. J. Aitken, *Chem. Commun.*, 2015, **51**, 16233–16236.

**Table S4** Torsion angles (deg) and relative thermodynamic properties (kcal/mol), and populations (%) for the four C<sub>8,9</sub>-ribbon structures of Boc-[(*R,R*)-*t*ACBC- $\gamma$ Abu]<sub>3</sub>-OMe in chloroform<sup>a</sup>

| Conf. <sup>b</sup>                                                               | Residues   | $\phi$ | $\theta$ | $\zeta$ | $\psi$ | $\Delta E_s^c$ | $\Delta H_s^d$ | $\Delta G_s^e$ | $\omega^f$ |
|----------------------------------------------------------------------------------|------------|--------|----------|---------|--------|----------------|----------------|----------------|------------|
| C <sub>9<sup>I</sup></sub> C <sub>9<sup>I</sup></sub> C <sub>9<sup>I</sup></sub> | $\beta$ 1  | 91     | -99      |         | 25     | 1.94           | 1.42           | 0.00           | 93.2       |
|                                                                                  | $\gamma$ 2 | -99    | 67       | 76      | -90    |                |                |                |            |
|                                                                                  | $\beta$ 3  | 91     | -100     |         | 27     |                |                |                |            |
|                                                                                  | $\gamma$ 4 | -99    | 67       | 76      | -91    |                |                |                |            |
|                                                                                  | $\beta$ 5  | 92     | -100     |         | 27     |                |                |                |            |
|                                                                                  | $\gamma$ 6 | -92    | 56       | 63      | 13     |                |                |                |            |
| C <sub>9<sup>I</sup></sub> C <sub>9<sup>I</sup></sub> C <sub>9<sup>N</sup></sub> | $\beta$ 1  | 90     | -99      |         | 24     | 0.00           | 0.00           | 1.63           | 5.9        |
|                                                                                  | $\gamma$ 2 | -99    | 67       | 77      | -90    |                |                |                |            |
|                                                                                  | $\beta$ 3  | 92     | -99      |         | 26     |                |                |                |            |
|                                                                                  | $\gamma$ 4 | 100    | -68      | -75     | 95     |                |                |                |            |
|                                                                                  | $\beta$ 5  | 88     | -98      |         | 17     |                |                |                |            |
|                                                                                  | $\gamma$ 6 | -80    | -45      | -60     | 178    |                |                |                |            |
| C <sub>9<sup>I</sup></sub> C <sub>9<sup>I</sup></sub> C <sub>9<sup>I</sup></sub> | $\beta$ 1  | 92     | -99      |         | 27     | 0.73           | 0.86           | 3.07           | 0.5        |
|                                                                                  | $\gamma$ 2 | 100    | -67      | -76     | 95     |                |                |                |            |
|                                                                                  | $\beta$ 3  | 89     | -99      |         | 28     |                |                |                |            |
|                                                                                  | $\gamma$ 4 | 101    | -68      | -75     | 95     |                |                |                |            |
|                                                                                  | $\beta$ 5  | 91     | -102     |         | 38     |                |                |                |            |
|                                                                                  | $\gamma$ 6 | 119    | -38      | -44     | -43    |                |                |                |            |
| C <sub>9<sup>I</sup></sub> C <sub>9<sup>I</sup></sub> C <sub>9<sup>I</sup></sub> | $\beta$ 1  | 91     | -99      |         | 25     | 1.68           | 1.73           | 3.30           | 0.4        |
|                                                                                  | $\gamma$ 2 | -98    | 67       | 76      | -91    |                |                |                |            |
|                                                                                  | $\beta$ 3  | 91     | -101     |         | 30     |                |                |                |            |
|                                                                                  | $\gamma$ 4 | 100    | -67      | -76     | 94     |                |                |                |            |
|                                                                                  | $\beta$ 5  | 89     | -99      |         | 27     |                |                |                |            |
|                                                                                  | $\gamma$ 6 | -92    | 56       | 64      | 12     |                |                |                |            |

<sup>a</sup> Torsion angles are defined in Fig. 3. Calculated at the M06-2X/def2-TZVP//PCM M06-2X/6-31+G(d) level of theory in chloroform at 25 °C. <sup>b</sup> Conformations are represented only by the structures of the  $\gamma$ Abu residue. The C<sub>9<sup>I</sup></sub> structure is the enantiomer of the C<sub>9<sup>I</sup></sub> structure for the H<sub>9<sup>I</sup></sub> helical structure of Ac-( $\gamma$ Abu)<sub>6</sub>-NHMe optimized at the HF/6-31G(d) level of theory (ref. s1). <sup>c</sup> Relative energies in chloroform. <sup>d</sup> Relative enthalpies in chloroform at 25 °C. <sup>e</sup> Relative Gibbs free energies in chloroform at 25 °C. <sup>f</sup> Populations calculated by  $\Delta G_s$  values in chloroform at 25 °C.

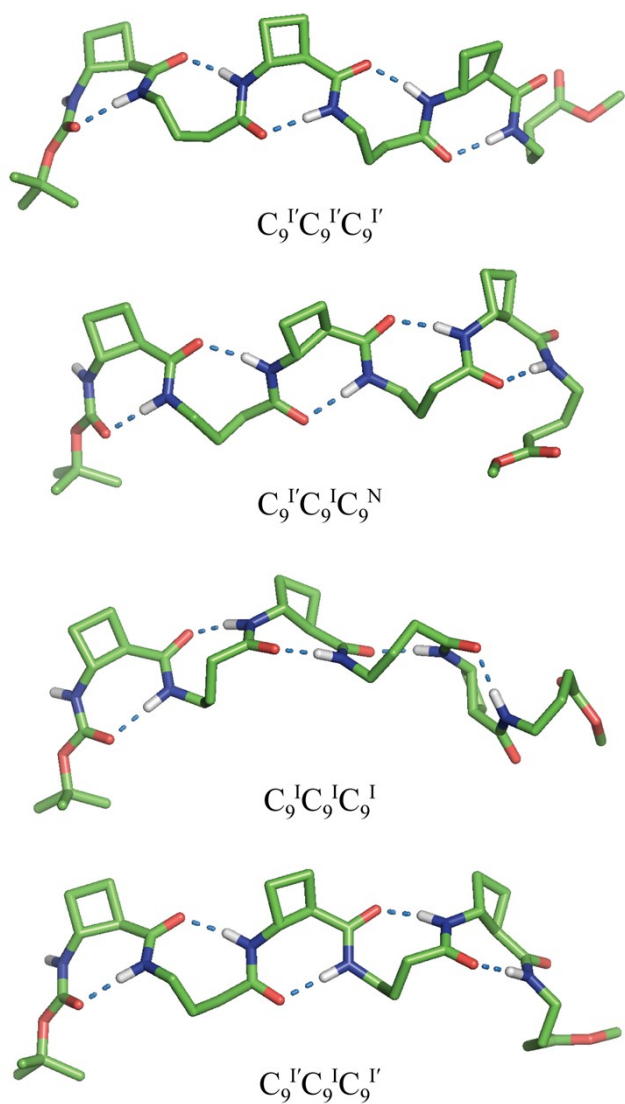

**Fig. S4** Four possible structures of Boc-[(*R,R*)-*t*ACBC- $\gamma$ Abu]<sub>3</sub>-OMe by considering the combination of  $C_9^I$  and  $C_9^I$  structures for  $\gamma$ Abu residues optimized at the PCM M06-2X/6-31+G(d) level of theory in chloroform. For clarity, all non-polar hydrogen atoms are omitted. All H-bonds are represented by dotted lines.

Cartesian coordinates of the H<sub>13</sub> helical structures of the pentamer composed of  $\beta$ Ac<sub>5</sub>a- $\gamma$ (Et)Ac<sub>5</sub>a dimeric units and its analog with two pyrrolidines at the first and fourth residues optimized at the PCM M06-2X/6-31+G(d) level of theory in chloroform:

|                                                                                                                              |           |           |           |   |           |           |           |
|------------------------------------------------------------------------------------------------------------------------------|-----------|-----------|-----------|---|-----------|-----------|-----------|
| (1) Ac-[ $\beta$ Ac <sub>5</sub> a- $\gamma$ (Et)Ac <sub>5</sub> a] <sub>2</sub> - $\beta$ Ac <sub>5</sub> a-NH <sub>2</sub> |           |           |           | H | -0.506240 | 3.030562  | 2.026750  |
|                                                                                                                              |           |           |           | H | -2.145503 | 0.635523  | 2.953995  |
| C                                                                                                                            | -4.276169 | -3.999129 | 1.872544  | H | -1.533839 | -1.012137 | 1.726970  |
| C                                                                                                                            | -3.952005 | -2.844703 | 0.957254  | H | 1.301003  | -1.260685 | 0.926937  |
| O                                                                                                                            | -3.035159 | -2.055187 | 1.211226  | H | -1.201169 | -1.637152 | -0.584731 |
| N                                                                                                                            | -4.694933 | -2.703468 | -0.156209 | H | -0.491171 | 0.092445  | -1.690579 |
| C                                                                                                                            | -4.404426 | -1.668038 | -1.138820 | H | 2.213617  | -0.036771 | -2.948499 |
| C                                                                                                                            | -4.542572 | -0.224368 | -0.575300 | H | 2.138476  | 2.364798  | -3.161477 |
| C                                                                                                                            | -3.201594 | 0.480953  | -0.510465 | H | 1.068351  | 1.737134  | -0.379624 |
| O                                                                                                                            | -2.380517 | 0.369469  | -1.428655 | H | 2.395341  | 0.656701  | 0.868640  |
| N                                                                                                                            | -2.994969 | 1.291324  | 0.547047  | H | 5.269161  | 0.621749  | 0.322447  |
| C                                                                                                                            | -1.872670 | 2.224997  | 0.622334  | H | 3.564991  | -1.840523 | 0.007615  |
| C                                                                                                                            | -1.458389 | 2.484327  | 2.078652  | H | 3.590009  | -1.827402 | -2.198372 |
| C                                                                                                                            | -1.216938 | 1.223184  | 2.911636  | H | 5.047487  | -1.633938 | -3.151995 |
| C                                                                                                                            | -0.141976 | 0.398538  | 2.211707  | C | -5.355965 | -1.743878 | -2.338305 |
| O                                                                                                                            | 1.026251  | 0.810447  | 2.158484  | H | -5.042422 | -2.495308 | -3.068371 |
| N                                                                                                                            | -0.551492 | -0.753052 | 1.661037  | H | -6.367164 | -2.001014 | -1.992474 |
| C                                                                                                                            | 0.305944  | -1.712347 | 0.991870  | C | -5.446925 | 0.524094  | -1.596649 |
| C                                                                                                                            | -0.209210 | -2.074784 | -0.443412 | H | -6.479006 | 0.524011  | -1.229173 |
| C                                                                                                                            | 0.749088  | -1.495730 | -1.467497 | H | -5.145698 | 1.567500  | -1.737192 |
| O                                                                                                                            | 1.776555  | -2.108193 | -1.792014 | C | -5.353555 | -0.313169 | -2.877142 |
| N                                                                                                                            | 0.432986  | -0.273419 | -1.929154 | H | -4.408211 | -0.108513 | -3.393010 |
| C                                                                                                                            | 1.241501  | 0.458781  | -2.899187 | H | -6.173403 | -0.117618 | -3.573614 |
| C                                                                                                                            | 1.365221  | 1.941595  | -2.506406 | C | -2.285015 | 3.622592  | 0.149061  |
| C                                                                                                                            | 1.804957  | 2.183611  | -1.063486 | H | -1.377338 | 4.210038  | -0.035620 |
| C                                                                                                                            | 3.151062  | 1.502714  | -0.829540 | H | -2.861084 | 3.592169  | -0.781210 |
| O                                                                                                                            | 4.113449  | 1.706984  | -1.573176 | C | -2.548972 | 3.443023  | 2.601141  |
| N                                                                                                                            | 3.204472  | 0.688896  | 0.245172  | H | -2.154156 | 4.123275  | 3.360221  |
| C                                                                                                                            | 4.418057  | 0.031705  | 0.682210  | H | -3.357200 | 2.875541  | 3.082787  |
| C                                                                                                                            | 4.568724  | -1.429386 | 0.164441  | C | -3.072922 | 4.198856  | 1.347108  |
| C                                                                                                                            | 5.332883  | -1.445510 | -1.147901 | H | -2.938263 | 5.279925  | 1.433340  |
| O                                                                                                                            | 6.542922  | -1.216658 | -1.185328 | H | -4.145994 | 4.023837  | 1.215359  |
| N                                                                                                                            | 4.602996  | -1.723074 | -2.247472 | C | 0.394695  | -3.052930 | 1.741897  |
| H                                                                                                                            | -4.426337 | -3.615133 | 2.884282  | H | -0.582220 | -3.266441 | 2.195969  |
| H                                                                                                                            | -3.414272 | -4.672641 | 1.895163  | H | 1.143971  | -3.021816 | 2.539648  |
| H                                                                                                                            | -5.159489 | -4.559788 | 1.561321  | C | -0.251235 | -3.614318 | -0.487655 |
| H                                                                                                                            | -5.428247 | -3.372595 | -0.353700 | H | -1.273669 | -3.946075 | -0.266589 |
| H                                                                                                                            | -3.372592 | -1.798554 | -1.485272 | H | 0.034538  | -4.006602 | -1.466869 |
| H                                                                                                                            | -5.000000 | -0.248583 | 0.418657  | C | 0.689839  | -4.065275 | 0.636910  |
| H                                                                                                                            | -3.733563 | 1.361433  | 1.237127  | H | 1.730302  | -3.969005 | 0.304023  |
| H                                                                                                                            | -1.062587 | 1.790858  | 0.031246  | H | 0.523596  | -5.101254 | 0.947338  |

|   |           |           |           |   |           |           |           |
|---|-----------|-----------|-----------|---|-----------|-----------|-----------|
| C | 0.530345  | 0.542241  | -4.254398 | C | -1.469961 | 2.379429  | 2.190919  |
| H | 1.258803  | 0.856274  | -5.010911 | C | -1.240413 | 1.075309  | 2.961579  |
| H | 0.114333  | -0.421100 | -4.564095 | C | -0.174104 | 0.277556  | 2.219121  |
| C | -0.005216 | 2.534762  | -2.896565 | O | 1.001835  | 0.670036  | 2.209083  |
| H | -0.693702 | 2.498401  | -2.041647 | N | -0.594332 | -0.823515 | 1.578573  |
| H | 0.079264  | 3.584914  | -3.191712 | C | 0.264440  | -1.743371 | 0.856995  |
| C | -0.540804 | 1.636381  | -4.045980 | C | -0.229235 | -1.998303 | -0.607611 |
| H | -0.720416 | 2.202544  | -4.964230 | C | 0.737890  | -1.337112 | -1.571172 |
| H | -1.493583 | 1.184490  | -3.750906 | O | 1.801453  | -1.894965 | -1.874792 |
| C | 4.494551  | -0.105275 | 2.204185  | N | 0.389808  | -0.113133 | -2.008087 |
| H | 4.686823  | 0.853781  | 2.695517  | C | 1.224899  | 0.686910  | -2.894279 |
| H | 3.539039  | -0.495296 | 2.584626  | C | 1.411867  | 2.117525  | -2.357327 |
| C | 5.306582  | -2.189183 | 1.298006  | C | 1.822008  | 2.215390  | -0.891043 |
| H | 4.649049  | -2.968851 | 1.697451  | C | 3.161002  | 1.506957  | -0.694608 |
| H | 6.217078  | -2.671574 | 0.933733  | O | 4.129642  | 1.752038  | -1.417384 |
| C | 5.605047  | -1.138608 | 2.385280  | N | 3.198674  | 0.627022  | 0.326330  |
| H | 6.575947  | -0.667111 | 2.191874  | C | 4.401368  | -0.071737 | 0.729983  |
| H | 5.636359  | -1.568308 | 3.390823  | C | 4.548553  | -1.489325 | 0.099791  |
| C | -0.775872 | 1.542098  | 4.344841  | C | 5.346136  | -1.411140 | -1.190181 |
| H | 0.127335  | 2.162743  | 4.304177  | O | 6.562812  | -1.218143 | -1.181325 |
| H | -1.559676 | 2.139983  | 4.824852  | N | 4.634071  | -1.563404 | -2.325624 |
| C | -0.509728 | 0.282572  | 5.167610  | H | -4.595148 | -3.840177 | 2.623276  |
| H | -1.396264 | -0.361850 | 5.194899  | H | -3.510058 | -4.837099 | 1.649028  |
| H | 0.315853  | -0.299111 | 4.742114  | H | -5.227032 | -4.702713 | 1.196070  |
| H | -0.243726 | 0.534150  | 6.198490  | H | -5.446684 | -3.337492 | -0.596442 |
| C | 1.921438  | 3.678502  | -0.733254 | H | -3.282379 | -1.733918 | -1.511761 |
| H | 0.935809  | 4.138811  | -0.877694 | H | -4.989565 | -0.303438 | 0.400148  |
| H | 2.602678  | 4.148785  | -1.454246 | H | -3.720063 | 1.270264  | 1.315711  |
| C | 2.406685  | 3.930400  | 0.694041  | H | -1.071481 | 1.794530  | 0.108792  |
| H | 2.355658  | 4.993888  | 0.947561  | H | -0.514120 | 2.921324  | 2.169019  |
| H | 1.799561  | 3.369998  | 1.415799  | H | -2.174709 | 0.495061  | 2.978533  |
| H | 3.445579  | 3.605375  | 0.820237  | H | -1.577327 | -1.084258 | 1.626801  |

## (2) The analog with two pyrrolidines

|   |           |           |           |   |           |           |           |
|---|-----------|-----------|-----------|---|-----------|-----------|-----------|
| C | -4.370186 | -4.162980 | 1.603839  | H | 1.265376  | -1.300440 | 0.838055  |
| C | -3.984561 | -2.957543 | 0.783686  | H | -1.224041 | -1.561734 | -0.726769 |
| O | -3.055817 | -2.214890 | 1.120551  | H | -0.550777 | 0.224656  | -1.789983 |
| N | -4.687923 | -2.718248 | -0.340987 | H | 2.173622  | 0.160873  | -3.015068 |
| C | -4.333191 | -1.622158 | -1.225289 | H | 2.207112  | 2.573703  | -2.961494 |
| C | -4.525317 | -0.221252 | -0.586887 | H | 1.070131  | 1.712832  | -0.265727 |
| C | -3.213772 | 0.526687  | -0.504389 | H | 2.384607  | 0.566917  | 0.940957  |
| O | -2.418345 | 0.502826  | -1.451306 | H | 5.262089  | 0.539268  | 0.434184  |
| N | -2.999962 | 1.264157  | 0.603007  | H | 3.543215  | -1.867897 | -0.116304 |
| C | -1.881301 | 2.196647  | 0.722823  | H | 3.617786  | -1.632927 | -2.301216 |
|   |           |           |           | H | 5.098335  | -1.397520 | -3.209011 |
|   |           |           |           | C | -5.208365 | -1.589172 | -2.497887 |
|   |           |           |           | H | -4.797647 | -2.190767 | -3.311456 |
|   |           |           |           | H | -6.215976 | -1.962144 | -2.265128 |

|   |           |           |           |   |           |           |           |
|---|-----------|-----------|-----------|---|-----------|-----------|-----------|
| C | -5.455499 | 0.512503  | -1.602764 | H | 0.167627  | 3.845257  | -2.907915 |
| H | -6.494516 | 0.421369  | -1.267150 | N | -0.411551 | 2.053369  | -3.920215 |
| H | -5.223736 | 1.575594  | -1.711867 | H | -0.508146 | 2.680588  | -4.710914 |
| N | -5.312709 | -0.184872 | -2.878766 | C | 4.448044  | -0.330205 | 2.237412  |
| H | -4.435822 | 0.106248  | -3.311714 | H | 4.643833  | 0.583606  | 2.807387  |
| C | -2.297629 | 3.615001  | 0.321081  | H | 3.480713  | -0.736008 | 2.568440  |
| H | -1.392199 | 4.216114  | 0.172722  | C | 5.245146  | -2.348886 | 1.186105  |
| H | -2.868510 | 3.630829  | -0.612559 | H | 4.563359  | -3.142131 | 1.511561  |
| C | -2.557194 | 3.316383  | 2.760904  | H | 6.153353  | -2.822381 | 0.804991  |
| H | -2.154535 | 3.965129  | 3.543107  | C | 5.540345  | -1.391907 | 2.356513  |
| H | -3.361169 | 2.730366  | 3.227244  | H | 6.522055  | -0.923636 | 2.217695  |
| C | -3.093133 | 4.122659  | 1.543990  | H | 5.545743  | -1.898658 | 3.326030  |
| H | -2.976280 | 5.200545  | 1.680854  | C | -0.794682 | 1.323308  | 4.406910  |
| H | -4.163048 | 3.935928  | 1.403265  | H | 0.117616  | 1.931536  | 4.392263  |
| C | 0.334398  | -3.134182 | 1.510615  | H | -1.569518 | 1.911112  | 4.913002  |
| H | -0.653945 | -3.380500 | 1.920541  | C | -0.546862 | 0.025821  | 5.174084  |
| H | 1.062891  | -3.161267 | 2.327486  | H | -1.443276 | -0.605200 | 5.177597  |
| C | -0.254858 | -3.531564 | -0.769711 | H | 0.268786  | -0.549455 | 4.721887  |
| H | -1.279120 | -3.886438 | -0.599637 | H | -0.274258 | 0.229834  | 6.213743  |
| H | 0.057605  | -3.846396 | -1.768533 | C | 1.935704  | 3.675055  | -0.423757 |
| C | 0.661595  | -4.061115 | 0.341374  | H | 0.948356  | 4.144521  | -0.524710 |
| H | 1.709745  | -3.938969 | 0.042511  | H | 2.614182  | 4.212747  | -1.098876 |
| H | 0.491168  | -5.117468 | 0.569745  | C | 2.419364  | 3.800421  | 1.020621  |
| C | 0.523371  | 0.954315  | -4.227310 | H | 2.354999  | 4.836156  | 1.368372  |
| H | 1.275875  | 1.238053  | -4.976774 | H | 1.820030  | 3.169140  | 1.687932  |
| H | -0.009835 | 0.068853  | -4.587506 | H | 3.462818  | 3.479588  | 1.116223  |
| C | 0.069547  | 2.770857  | -2.721105 |   |           |           |           |
| H | -0.655772 | 2.642949  | -1.903046 |   |           |           |           |
